# Supplementary material for: Targeting BRF2 in Cancer with Repurposed Drugs Using in Silico Methods
Source: Preprints.org preprint supplement (doi:10.20944/preprints202012.0770.v1), 2020-12-31

# Chemosensitivity, proliferation, stemness and autophagy (BRF2)

|                                        | Cancer type                   |                                |                                  |                                |                               |                                |                               |                                |                                |                                |                               |                                |                                |                                 |                                |                                |                                |                              |                                |                                |                                |                                |                                |                                |                                |                                |                                |                                |                                 |                                |                               |                               |  |
|----------------------------------------|-------------------------------|--------------------------------|----------------------------------|--------------------------------|-------------------------------|--------------------------------|-------------------------------|--------------------------------|--------------------------------|--------------------------------|-------------------------------|--------------------------------|--------------------------------|---------------------------------|--------------------------------|--------------------------------|--------------------------------|------------------------------|--------------------------------|--------------------------------|--------------------------------|--------------------------------|--------------------------------|--------------------------------|--------------------------------|--------------------------------|--------------------------------|--------------------------------|---------------------------------|--------------------------------|-------------------------------|-------------------------------|--|
|                                        | ACC                           | BLCA                           | BRCA                             | CESC                           | CHOL                          | COAD                           | DLBC                          | ESCA                           | GBM                            | HNSC                           | KICH                          | KIRC                           | KIRP                           | LGG                             | LIHC                           | LUAD                           | LUSC                           | MESO                         | OV                             | PAAD                           | PCPG                           | PRAD                           | READ                           | SARC                           | SKCM                           | STAD                           | TGCT                           | THCA                           | THYM                            | UCEC                           | UCS                           | UVM                           |  |
| Autophagy-related prognostic signature | r=-0.0579<br>p=0.6121<br>n=79 | r=0.0189<br>p=0.7038<br>n=408  | r=-0.1477<br>p=8.3e-07<br>n=1104 | r=-0.0708<br>p=0.2162<br>n=307 | r=-0.2329<br>p=0.1716<br>n=36 | r=-0.0794<br>p=0.0913<br>n=453 | r=-0.2160<br>p=0.1404<br>n=48 | r=-0.0078<br>p=0.9166<br>n=185 | r=-0.0911<br>p=0.2578<br>n=156 | r=0.0896<br>p=0.0407<br>n=522  | r=-0.1001<br>p=0.4239<br>n=66 | r=-0.0491<br>p=0.2581<br>n=533 | r=-0.0935<br>p=0.1120<br>n=290 | r=-0.0869<br>p=0.0486<br>n=516  | r=-0.0379<br>p=0.4672<br>n=371 | r=-0.1009<br>p=0.0220<br>n=515 | r=0.0050<br>p=0.9107<br>n=503  | r=0.1291<br>p=0.2334<br>n=87 | r=-0.1219<br>p=0.0333<br>n=305 | r=-0.0905<br>p=0.2285<br>n=179 | r=-0.0133<br>p=0.8592<br>n=181 | r=-0.0777<br>p=0.0832<br>n=498 | r=0.0325<br>p=0.6832<br>n=160  | r=-0.1292<br>p=0.0374<br>n=260 | r=-0.0204<br>p=0.6584<br>n=472 | r=0.0572<br>p=0.2453<br>n=415  | r=-0.1188<br>p=0.1477<br>n=150 | r=-0.0092<br>p=0.8349<br>n=513 | r=-0.5049<br>p=4.1e-09<br>n=120 | r=-0.0190<br>p=0.6613<br>n=532 | r=-0.0140<br>p=0.9177<br>n=57 | r=0.0021<br>p=0.9852<br>n=80  |  |
| Stemness (mRNA)                        | r=0.0457<br>p=0.6947<br>n=76  | r=0.0081<br>p=0.8721<br>n=400  | r=0.1303<br>p=1.9e-05<br>n=1072  | r=0.0761<br>p=0.1954<br>n=291  | r=0.2257<br>p=0.1857<br>n=36  | r=0.0191<br>p=0.6919<br>n=434  | r=NA<br>p=NA<br>n=NA          | r=0.2738<br>p=0.0002<br>n=182  | r=0.1709<br>p=0.0371<br>n=149  | r=0.1939<br>p=1.0e-05<br>n=510 | r=NA<br>p=NA<br>NA            | r=0.0008<br>p=0.9849<br>n=507  | r=0.1961<br>p=0.0009<br>n=283  | r=0.1481<br>p=0.0008<br>n=511   | r=0.0668<br>p=0.2058<br>n=361  | r=0.1853<br>p=2.7e-05<br>n=507 | r=0.1747<br>p=0.0001<br>n=484  | r=0.1658<br>p=0.1248<br>n=87 | r=0.1188<br>p=0.0402<br>n=299  | r=0.1447<br>p=0.0715<br>n=156  | r=0.1681<br>p=0.0320<br>n=163  | r=-0.1137<br>p=0.0119<br>n=488 | r=-0.0498<br>p=0.5395<br>n=154 | r=0.0251<br>p=0.6925<br>n=250  | r=-0.0680<br>p=0.1411<br>n=470 | r=0.1976<br>p=7.0e-05<br>n=399 | r=0.4659<br>p=2.1e-09<br>n=149 | r=0.2167<br>p=9.5e-07<br>n=502 | r=0.7146<br>p=7.2e-20<br>n=119  | r=0.1905<br>p=1.2e-05<br>n=521 | r=0.1036<br>p=0.4475<br>n=56  | r=-0.1968<br>p=0.0802<br>n=80 |  |
| Stemness (DNA methylation)             | r=0.0471<br>p=0.6859<br>n=76  | r=0.0399<br>p=0.4261<br>n=400  | r=0.0167<br>p=0.6430<br>n=771    | r=0.2001<br>p=0.0006<br>n=291  | r=-0.2631<br>p=0.1210<br>n=36 | r=0.0522<br>p=0.3771<br>n=288  | r=NA<br>p=NA<br>n=NA          | r=0.2557<br>p=0.0005<br>n=182  | r=-0.0010<br>p=0.9944<br>n=49  | r=0.1755<br>p=6.8e-05<br>n=510 | r=NA<br>p=NA<br>NA            | r=-0.1151<br>p=0.0442<br>n=306 | r=-0.0896<br>p=0.1434<br>n=268 | r=-0.0869<br>p=0.0497<br>n=511  | r=-0.0592<br>p=0.2616<br>n=361 | r=0.1154<br>p=0.0144<br>n=449  | r=0.2196<br>p=2.6e-05<br>n=360 | r=0.0723<br>p=0.5057<br>n=87 | r=-0.3167<br>p=0.4064<br>n=9   | r=0.0826<br>p=0.3051<br>n=156  | r=-0.0911<br>p=0.2474<br>n=163 | r=0.0290<br>p=0.5228<br>n=488  | r=-0.2023<br>p=0.0531<br>n=92  | r=0.1307<br>p=0.0385<br>n=251  | r=0.1038<br>p=0.0244<br>n=470  | r=0.1355<br>p=0.0092<br>n=368  | r=0.5791<br>p=1.0e-14<br>n=149 | r=-0.1216<br>p=0.0064<br>n=502 | r=-0.4554<br>p=2.0e-07<br>n=119 | r=0.1426<br>p=0.0038<br>n=411  | r=0.1881<br>p=0.1651<br>n=56  | r=-0.0573<br>p=0.6137<br>n=80 |  |
| Predicted pCR to T/FAC chemotherapy    | r=0.0030<br>p=0.9794<br>n=77  | r=-0.0601<br>p=0.2281<br>n=404 | r=-0.1048<br>p=0.0005<br>n=1085  | r=0.0070<br>p=0.9051<br>n=294  | r=-0.0786<br>p=0.6486<br>n=36 | r=0.0078<br>p=0.8693<br>n=444  | r=-0.3891<br>p=0.0063<br>n=48 | r=0.0257<br>p=0.7288<br>n=184  | r=0.1877<br>p=0.0219<br>n=149  | r=-0.0908<br>p=0.0393<br>n=516 | r=NA<br>p=NA<br>NA            | r=-0.0914<br>p=0.0362<br>n=525 | r=-0.1698<br>p=0.0038<br>n=288 | r=-0.2020<br>p=4.0e-06<br>n=513 | r=0.0953<br>p=0.0695<br>n=364  | r=0.0364<br>p=0.4116<br>n=512  | r=0.0922<br>p=0.0395<br>n=499  | r=0.0846<br>p=0.4362<br>n=87 | r=0.0974<br>p=0.0913<br>n=302  | r=-0.1188<br>p=0.1141<br>n=178 | r=-0.1166<br>p=0.1370<br>n=164 | r=-0.0672<br>p=0.1364<br>n=492 | r=-0.0807<br>p=0.3138<br>n=158 | r=0.0746<br>p=0.2346<br>n=256  | r=-0.0778<br>p=0.0922<br>n=470 | r=0.1706<br>p=0.0009<br>n=375  | r=0.2667<br>p=0.0010<br>n=150  | r=-0.0447<br>p=0.3161<br>n=504 | r=0.5249<br>p=8.9e-10<br>n=119  | r=-0.0840<br>p=0.0548<br>n=524 | r=0.2002<br>p=0.1390<br>n=56  | r=0.1308<br>p=0.2477<br>n=80  |  |
| Proliferation score                    | r=0.1893<br>p=0.1014<br>n=76  | r=-0.0027<br>p=0.9567<br>n=393 | r=0.0856<br>p=0.0051<br>n=1072   | r=0.0462<br>p=0.4329<br>n=290  | r=-0.1244<br>p=0.4764<br>n=35 | r=-0.0048<br>p=0.9213<br>n=434 | r=-0.1281<br>p=0.3854<br>n=48 | r=0.1840<br>p=0.0154<br>n=173  | r=0.0435<br>p=0.5985<br>n=149  | r=0.1981<br>p=6.6e-06<br>n=510 | r=NA<br>p=NA<br>NA            | r=-0.0448<br>p=0.3142<br>n=507 | r=0.1232<br>p=0.0404<br>n=277  | r=-0.2725<br>p=3.8e-10<br>n=511 | r=0.1090<br>p=0.0401<br>n=355  | r=0.0447<br>p=0.3422<br>n=454  | r=0.1366<br>p=0.0026<br>n=484  | r=0.1262<br>p=0.2554<br>n=83 | r=-0.0545<br>p=0.3751<br>n=267 | r=0.0012<br>p=0.9883<br>n=151  | r=0.0225<br>p=0.7755<br>n=163  | r=0.0628<br>p=0.2096<br>n=401  | r=-0.0470<br>p=0.5626<br>n=154 | r=-0.0228<br>p=0.7369<br>n=220 | r=-0.1607<br>p=0.0005<br>n=470 | r=0.1990<br>p=7.8e-05<br>n=389 | r=0.2844<br>p=0.0004<br>n=149  | r=-0.1713<br>p=0.0001<br>n=502 | r=0.4992<br>p=7.5e-09<br>n=119  | r=0.0739<br>p=0.0919<br>n=521  | r=-0.1412<br>p=0.2992<br>n=56 | r=-0.3327<br>p=0.0026<br>n=80 |  |

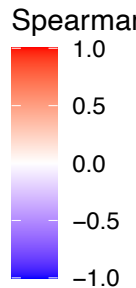

Supplement: Supplementary file 2 [file supplementary]
