# Supplementary material for: Targeting BRF2 in Cancer with Repurposed Drugs Using in Silico Methods
Source: Preprints.org preprint supplement (doi:10.20944/preprints202012.0770.v1), 2020-12-31

# Hypoxia and angiogenesis (BRF2)

## Cancer type

|                            | ACC                          | BLCA                           | BRCA                             | CESC                           | CHOL                         | COAD                           | ESCA                           | GBM                            | HNSC                           | KICH                          | KIRC                           | KIRP                           | LGG                            | LIHC                           | LUAD                            | LUSC                           | MESO                          | OV                             | PAAD                           | PCPG                           | PRAD                           | READ                          | SARC                          | SKCM                           | STAD                            | TGCT                            | THCA                            | UCEC                           | UCS                           | UVM                           |
|----------------------------|------------------------------|--------------------------------|----------------------------------|--------------------------------|------------------------------|--------------------------------|--------------------------------|--------------------------------|--------------------------------|-------------------------------|--------------------------------|--------------------------------|--------------------------------|--------------------------------|---------------------------------|--------------------------------|-------------------------------|--------------------------------|--------------------------------|--------------------------------|--------------------------------|-------------------------------|-------------------------------|--------------------------------|---------------------------------|---------------------------------|---------------------------------|--------------------------------|-------------------------------|-------------------------------|
| Angiogenesis score         | r=0.0390<br>p=0.7348<br>n=78 | r=-0.0726<br>p=0.1488<br>n=397 | r=-0.1279<br>p=2.4e-05<br>n=1083 | r=0.1053<br>p=0.0687<br>n=300  | r=0.0202<br>p=0.9084<br>n=35 | r=0.0091<br>p=0.8497<br>n=441  | r=-0.1377<br>p=0.0707<br>n=173 | r=0.0059<br>p=0.9412<br>n=156  | r=-0.0797<br>p=0.0712<br>n=514 | r=-0.3836<br>p=0.0016<br>n=65 | r=-0.0289<br>p=0.5131<br>n=515 | r=0.2182<br>p=0.0002<br>n=279  | r=-0.0362<br>p=0.4127<br>n=514 | r=-0.0286<br>p=0.5881<br>n=362 | r=-0.0829<br>p=0.0768<br>n=457  | r=-0.1387<br>p=0.0021<br>n=487 | r=-0.2240<br>p=0.0418<br>n=83 | r=-0.1449<br>p=0.0172<br>n=270 | r=0.0735<br>p=0.3696<br>n=151  | r=0.0167<br>p=0.8249<br>n=178  | r=0.0058<br>p=0.9073<br>n=405  | r=0.0167<br>p=0.8360<br>n=156 | r=0.0150<br>p=0.8236<br>n=223 | r=0.1406<br>p=0.1565<br>n=103  | r=-0.2193<br>p=1.2e-05<br>n=391 | r=-0.4162<br>p=1.3e-07<br>n=149 | r=-0.0095<br>p=0.8330<br>n=500  | r=0.1437<br>p=0.0009<br>n=528  | r=-0.0892<br>p=0.5095<br>n=57 | r=-0.0151<br>p=0.8943<br>n=80 |
| Hypoxia score (Winter)     | r=NA<br>p=NA<br>NA           | r=0.0143<br>p=0.7768<br>n=394  | r=0.1096<br>p=0.0003<br>n=1068   | r=0.0996<br>p=0.0826<br>n=305  | r=NA<br>p=NA<br>NA           | r=0.0986<br>p=0.0995<br>n=280  | r=NA<br>p=NA<br>NA             | r=0.2968<br>p=0.0002<br>n=149  | r=-0.0630<br>p=0.1509<br>n=522 | r=NA<br>p=NA<br>NA            | r=0.1395<br>p=0.0016<br>n=510  | r=0.2762<br>p=2.7e-06<br>n=280 | r=0.0925<br>p=0.0356<br>n=516  | r=0.1286<br>p=0.0134<br>n=369  | r=0.1503<br>p=0.0007<br>n=500   | r=0.1055<br>p=0.0182<br>n=501  | r=NA<br>p=NA<br>NA            | r=0.0664<br>p=0.2586<br>n=291  | r=0.0053<br>p=0.9447<br>n=171  | r=0.0287<br>p=0.7009<br>n=181  | r=0.0807<br>p=0.1424<br>n=332  | r=0.0929<br>p=0.3919<br>n=87  | r=NA<br>p=NA<br>NA            | r=0.0715<br>p=0.1305<br>n=449  | r=NA<br>p=NA<br>NA              | r=NA<br>p=NA<br>NA              | r=0.0067<br>p=0.8804<br>n=509   | r=0.0569<br>p=0.4586<br>n=172  | r=NA<br>p=NA<br>NA            | r=NA<br>p=NA<br>NA            |
| Hypoxia score (West)       | r=NA<br>p=NA<br>NA           | r=-0.0175<br>p=0.7337<br>n=382 | r=0.0440<br>p=0.1555<br>n=1043   | r=0.0613<br>p=0.2917<br>n=298  | r=NA<br>p=NA<br>NA           | r=0.0505<br>p=0.4128<br>n=265  | r=NA<br>p=NA<br>NA             | r=0.1400<br>p=0.0919<br>n=146  | r=-0.1043<br>p=0.0176<br>n=517 | r=NA<br>p=NA<br>NA            | r=-0.0256<br>p=0.5630<br>n=513 | r=0.0365<br>p=0.5545<br>n=265  | r=0.1149<br>p=0.0093<br>n=512  | r=0.0557<br>p=0.2923<br>n=360  | r=0.0621<br>p=0.1734<br>n=482   | r=0.1037<br>p=0.0211<br>n=494  | r=NA<br>p=NA<br>NA            | r=-0.1005<br>p=0.0956<br>n=276 | r=-0.0977<br>p=0.2162<br>n=162 | r=0.1142<br>p=0.1312<br>n=176  | r=0.1037<br>p=0.0595<br>n=331  | r=-0.0068<br>p=0.9510<br>n=85 | r=NA<br>p=NA<br>NA            | r=0.0153<br>p=0.7542<br>n=421  | r=NA<br>p=NA<br>NA              | r=NA<br>p=NA<br>NA              | r=-0.0918<br>p=0.0383<br>n=509  | r=-0.0903<br>p=0.2575<br>n=159 | r=NA<br>p=NA<br>NA            | r=NA<br>p=NA<br>NA            |
| Hypoxia score (Sorensen)   | r=NA<br>p=NA<br>NA           | r=-0.0159<br>p=0.7586<br>n=375 | r=-0.1469<br>p=1.9e-06<br>n=1041 | r=0.0106<br>p=0.8596<br>n=279  | r=NA<br>p=NA<br>NA           | r=0.0501<br>p=0.4212<br>n=260  | r=NA<br>p=NA<br>NA             | r=0.0748<br>p=0.3677<br>n=147  | r=-0.0234<br>p=0.6068<br>n=487 | r=NA<br>p=NA<br>NA            | r=-0.0309<br>p=0.4791<br>n=526 | r=-0.0615<br>p=0.3274<br>n=256 | r=0.1104<br>p=0.0145<br>n=490  | r=-0.0321<br>p=0.5479<br>n=353 | r=0.0500<br>p=0.2787<br>n=471   | r=0.0990<br>p=0.0285<br>n=490  | r=NA<br>p=NA<br>NA            | r=0.0128<br>p=0.8322<br>n=278  | r=-0.1195<br>p=0.1274<br>n=164 | r=-0.0670<br>p=0.3767<br>n=176 | r=-0.0051<br>p=0.9268<br>n=328 | r=-0.0746<br>p=0.5001<br>n=84 | r=NA<br>p=NA<br>NA            | r=0.0303<br>p=0.5304<br>n=432  | r=NA<br>p=NA<br>NA              | r=NA<br>p=NA<br>NA              | r=-0.1475<br>p=0.0009<br>n=501  | r=-0.0774<br>p=0.3305<br>n=160 | r=NA<br>p=NA<br>NA            | r=NA<br>p=NA<br>NA            |
| Hypoxia score (Seigneuric) | r=NA<br>p=NA<br>NA           | r=0.0031<br>p=0.9504<br>n=408  | r=-0.1112<br>p=0.0002<br>n=1100  | r=-0.0817<br>p=0.1541<br>n=306 | r=NA<br>p=NA<br>NA           | r=-0.1609<br>p=0.0064<br>n=286 | r=NA<br>p=NA<br>NA             | r=-0.1486<br>p=0.0649<br>n=155 | r=0.0242<br>p=0.5807<br>n=522  | r=NA<br>p=NA<br>NA            | r=-0.0074<br>p=0.8639<br>n=533 | r=-0.1470<br>p=0.0122<br>n=290 | r=-0.1247<br>p=0.0046<br>n=516 | r=0.0695<br>p=0.1816<br>n=371  | r=0.0298<br>p=0.4995<br>n=515   | r=0.0188<br>p=0.6748<br>n=502  | r=NA<br>p=NA<br>NA            | r=-0.0709<br>p=0.2176<br>n=304 | r=-0.1632<br>p=0.0291<br>n=179 | r=-0.2543<br>p=0.0006<br>n=181 | r=0.1712<br>p=0.0017<br>n=333  | r=-0.1226<br>p=0.2392<br>n=94 | r=NA<br>p=NA<br>NA            | r=-0.0451<br>p=0.3288<br>n=471 | r=NA<br>p=NA<br>NA              | r=NA<br>p=NA<br>NA              | r=-0.1684<br>p=0.0001<br>n=509  | r=0.0015<br>p=0.9838<br>n=177  | r=NA<br>p=NA<br>NA            | r=NA<br>p=NA<br>NA            |
| Hypoxia score (Ragnum)     | r=NA<br>p=NA<br>NA           | r=-0.0036<br>p=0.9435<br>n=398 | r=0.0871<br>p=0.0045<br>n=1060   | r=-0.0211<br>p=0.7135<br>n=306 | r=NA<br>p=NA<br>NA           | r=0.0264<br>p=0.6598<br>n=280  | r=NA<br>p=NA<br>NA             | r=0.0904<br>p=0.2796<br>n=145  | r=0.0854<br>p=0.0538<br>n=511  | r=NA<br>p=NA<br>NA            | r=0.0263<br>p=0.5546<br>n=508  | r=0.0300<br>p=0.6169<br>n=281  | r=-0.0094<br>p=0.8329<br>n=511 | r=0.0565<br>p=0.2914<br>n=351  | r=0.1142<br>p=0.0106<br>n=501   | r=0.1552<br>p=0.0005<br>n=499  | r=NA<br>p=NA<br>NA            | r=-0.0437<br>p=0.4601<br>n=288 | r=-0.1558<br>p=0.0412<br>n=172 | r=-0.0145<br>p=0.8464<br>n=181 | r=0.0135<br>p=0.8061<br>n=331  | r=0.0066<br>p=0.9507<br>n=91  | r=NA<br>p=NA<br>NA            | r=-0.0817<br>p=0.0894<br>n=433 | r=NA<br>p=NA<br>NA              | r=NA<br>p=NA<br>NA              | r=0.0535<br>p=0.2281<br>n=509   | r=0.0237<br>p=0.7574<br>n=173  | r=NA<br>p=NA<br>NA            | r=NA<br>p=NA<br>NA            |
| Hypoxia score (Hu)         | r=NA<br>p=NA<br>NA           | r=-0.0674<br>p=0.1744<br>n=408 | r=0.0229<br>p=0.4474<br>n=1100   | r=0.0514<br>p=0.3700<br>n=306  | r=NA<br>p=NA<br>NA           | r=0.0129<br>p=0.8277<br>n=286  | r=NA<br>p=NA<br>NA             | r=0.0086<br>p=0.9157<br>n=155  | r=-0.0028<br>p=0.9489<br>n=522 | r=NA<br>p=NA<br>NA            | r=-0.0220<br>p=0.6129<br>n=533 | r=0.1099<br>p=0.0616<br>n=290  | r=0.0272<br>p=0.5374<br>n=516  | r=0.0006<br>p=0.9902<br>n=371  | r=0.0238<br>p=0.5895<br>n=515   | r=0.0088<br>p=0.8437<br>n=502  | r=NA<br>p=NA<br>NA            | r=-0.0515<br>p=0.3709<br>n=304 | r=-0.0504<br>p=0.5032<br>n=179 | r=-0.0439<br>p=0.5571<br>n=181 | r=-0.0638<br>p=0.2455<br>n=333 | r=-0.1249<br>p=0.2303<br>n=94 | r=NA<br>p=NA<br>NA            | r=0.0411<br>p=0.3730<br>n=471  | r=NA<br>p=NA<br>NA              | r=NA<br>p=NA<br>NA              | r=0.0270<br>p=0.5438<br>n=509   | r=-0.0458<br>p=0.5448<br>n=177 | r=NA<br>p=NA<br>NA            | r=NA<br>p=NA<br>NA            |
| Hypoxia score (Elvidge)    | r=NA<br>p=NA<br>NA           | r=-0.0762<br>p=0.1272<br>n=402 | r=-0.1879<br>p=5.3e-10<br>n=1076 | r=-0.0415<br>p=0.4736<br>n=300 | r=NA<br>p=NA<br>NA           | r=-0.0985<br>p=0.1000<br>n=280 | r=NA<br>p=NA<br>NA             | r=-0.0851<br>p=0.2925<br>n=155 | r=-0.0974<br>p=0.0276<br>n=512 | r=NA<br>p=NA<br>NA            | r=-0.0151<br>p=0.7279<br>n=532 | r=-0.0741<br>p=0.2122<br>n=285 | r=-0.1273<br>p=0.0039<br>n=513 | r=-0.0542<br>p=0.2994<br>n=369 | r=-0.1847<br>p=2.8e-05<br>n=507 | r=-0.0917<br>p=0.0409<br>n=497 | r=NA<br>p=NA<br>NA            | r=-0.2057<br>p=0.0004<br>n=295 | r=-0.2045<br>p=0.0062<br>n=178 | r=-0.1834<br>p=0.0135<br>n=181 | r=0.0175<br>p=0.7530<br>n=326  | r=-0.0653<br>p=0.5341<br>n=93 | r=NA<br>p=NA<br>NA            | r=-0.0279<br>p=0.5472<br>n=467 | r=NA<br>p=NA<br>NA              | r=NA<br>p=NA<br>NA              | r=-0.2986<br>p=9.8e-12<br>n=499 | r=-0.1523<br>p=0.0442<br>n=175 | r=NA<br>p=NA<br>NA            | r=NA<br>p=NA<br>NA            |
| Hypoxia score (Buffa)      | r=NA<br>p=NA<br>NA           | r=0.0257<br>p=0.6051<br>n=408  | r=0.1513<br>p=4.6e-07<br>n=1100  | r=0.1363<br>p=0.0170<br>n=306  | r=NA<br>p=NA<br>NA           | r=0.1104<br>p=0.0621<br>n=286  | r=NA<br>p=NA<br>NA             | r=0.3686<br>p=2.4e-06<br>n=155 | r=-0.0100<br>p=0.8203<br>n=522 | r=NA<br>p=NA<br>NA            | r=0.0862<br>p=0.0466<br>n=533  | r=0.2667<br>p=4.1e-06<br>n=290 | r=0.1513<br>p=0.0006<br>n=516  | r=0.1024<br>p=0.0487<br>n=371  | r=0.1662<br>p=0.0002<br>n=515   | r=0.2470<br>p=2.1e-08<br>n=502 | r=NA<br>p=NA<br>NA            | r=0.0609<br>p=0.2895<br>n=304  | r=0.0077<br>p=0.9190<br>n=179  | r=0.1272<br>p=0.0879<br>n=181  | r=0.0548<br>p=0.3184<br>n=333  | r=-0.0203<br>p=0.8463<br>n=94 | r=NA<br>p=NA<br>NA            | r=0.0350<br>p=0.4481<br>n=471  | r=NA<br>p=NA<br>NA              | r=NA<br>p=NA<br>NA              | r=0.1321<br>p=0.0028<br>n=509   | r=0.0730<br>p=0.3343<br>n=177  | r=NA<br>p=NA<br>NA            | r=NA<br>p=NA<br>NA            |

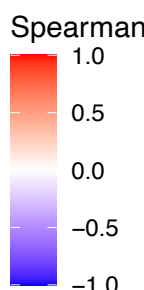

Supplement: Supplementary file 3 [file supplementary]
