# Supplementary material for: Targeting BRF2 in Cancer with Repurposed Drugs Using in Silico Methods
Source: Preprints.org preprint supplement (doi:10.20944/preprints202012.0770.v1), 2020-12-31
Supplement: Supplementary file 1 [file supplementary]

## Immune cell infiltration (BRF2)

| Lymphocyte type              | Cancer type                   |                                |                                 |                                |                                |                                |                               |                                |                                |                                |                               |                                |                                 |                                |                                |                                 |                                |                               |                                |                                |                                |                                |                                |                                |                                |                                |                                 |                                 |                                 |                                |                               |                               | Spearman_r |
|------------------------------|-------------------------------|--------------------------------|---------------------------------|--------------------------------|--------------------------------|--------------------------------|-------------------------------|--------------------------------|--------------------------------|--------------------------------|-------------------------------|--------------------------------|---------------------------------|--------------------------------|--------------------------------|---------------------------------|--------------------------------|-------------------------------|--------------------------------|--------------------------------|--------------------------------|--------------------------------|--------------------------------|--------------------------------|--------------------------------|--------------------------------|---------------------------------|---------------------------------|---------------------------------|--------------------------------|-------------------------------|-------------------------------|------------|
|                              | ACC                           | BLCA                           | BRCA                            | CESC                           | CHOL                           | COAD                           | DLBC                          | ESCA                           | GBM                            | HNSC                           | KICH                          | KIRC                           | KIRP                            | LGG                            | LIHC                           | LUAD                            | LUSC                           | MESO                          | OV                             | PAAD                           | PCPG                           | PRAD                           | READ                           | SARC                           | SKCM                           | STAD                           | TGCT                            | THCA                            | THYM                            | UCEC                           | UCS                           | UVM                           |            |
| Macrophages                  | r=0.0125<br>p=0.9138<br>n=78  | r=0.0434<br>p=0.3885<br>n=397  | r=0.0068<br>p=0.8217<br>n=1090  | r=0.1467<br>p=0.0107<br>n=302  | r=-0.2254<br>p=0.1929<br>n=35  | r=0.0580<br>p=0.2239<br>n=442  | r=-0.0437<br>p=0.7680<br>n=48 | r=-0.0626<br>p=0.4120<br>n=174 | r=0.0358<br>p=0.6570<br>n=156  | r=-0.1347<br>p=0.0022<br>n=516 | r=-0.1062<br>p=0.3999<br>n=65 | r=0.0475<br>p=0.2818<br>n=515  | r=0.01259<br>p=0.0355<br>n=279  | r=-0.0449<br>p=0.3102<br>n=514 | r=-0.0386<br>p=0.4640<br>n=362 | r=-0.0525<br>p=0.2628<br>n=457  | r=-0.1072<br>p=0.0179<br>n=487 | r=-0.0090<br>p=0.9356<br>n=83 | r=-0.0226<br>p=0.6951<br>n=303 | r=-0.1294<br>p=0.1122<br>n=152 | r=0.0356<br>p=0.6355<br>n=180  | r=-0.0773<br>p=0.1201<br>n=406 | r=0.0732<br>p=0.3638<br>n=156  | r=0.0126<br>p=0.8512<br>n=224  | r=0.0237<br>p=0.6084<br>n=471  | r=0.0246<br>p=0.6284<br>n=391  | r=-0.4960<br>p=1.3e-10<br>n=149 | r=0.0082<br>p=0.8540<br>n=508   | r=-0.3628<br>p=4.7e-05<br>n=120 | r=0.0999<br>p=0.0216<br>n=528  | r=0.1278<br>p=0.3436<br>n=57  | r=0.0231<br>p=0.8386<br>n=80  |            |
| Dendritic Cells              | r=0.0860<br>p=0.4662<br>n=74  | r=0.0200<br>p=0.7055<br>n=360  | r=-0.0519<br>p=0.1463<br>n=786  | r=-0.0181<br>p=0.7597<br>n=289 | r=0.0257<br>p=0.9052<br>n=24   | r=-0.0471<br>p=0.3958<br>n=327 | r=0.0182<br>p=0.9576<br>n=11  | r=-0.1027<br>p=0.1936<br>n=162 | r=0.0913<br>p=0.4696<br>n=65   | r=-0.0088<br>p=0.8460<br>n=489 | r=0.0039<br>p=0.9810<br>n=39  | r=0.0356<br>p=0.5505<br>n=283  | r=0.0032<br>p=0.9685<br>n=155   | r=-0.0175<br>p=0.8019<br>n=207 | r=0.0140<br>p=0.8268<br>n=248  | r=0.0189<br>p=0.7015<br>n=415   | r=-0.1327<br>p=0.0058<br>n=430 | r=-0.3422<br>p=0.0595<br>n=31 | r=-0.0836<br>p=0.2367<br>n=202 | r=0.0602<br>p=0.4945<br>n=131  | r=-0.0196<br>p=0.8232<br>n=133 | r=-0.1035<br>p=0.0579<br>n=336 | r=-0.0052<br>p=0.9567<br>n=112 | r=0.1261<br>p=0.1978<br>n=106  | r=0.0614<br>p=0.3057<br>n=280  | r=-0.1103<br>p=0.0459<br>n=328 | r=-0.2190<br>p=0.0646<br>n=72   | r=-0.0953<br>p=0.0468<br>n=436  | r=-0.0539<br>p=0.5674<br>n=115  | r=0.0272<br>p=0.5866<br>n=401  | r=0.0638<br>p=0.7471<br>n=28  | r=-0.0143<br>p=0.9214<br>n=50 |            |
| Mast Cells                   | r=-0.0613<br>p=0.5986<br>n=76 | r=-0.0410<br>p=0.4205<br>n=388 | r=0.0085<br>p=0.8217<br>n=1077  | r=0.0299<br>p=0.6099<br>n=293  | r=0.1533<br>p=0.0765<br>n=32   | r=0.0635<br>p=0.1860<br>n=436  | r=0.2423<br>p=0.1221<br>n=42  | r=-0.1217<br>p=0.1128<br>n=171 | r=-0.0105<br>p=0.9076<br>n=154 | r=-0.1123<br>p=0.0111<br>n=511 | r=0.1429<br>p=0.2600<br>n=64  | r=0.0013<br>p=0.9765<br>n=506  | r=-0.2218<br>p=0.0002<br>n=273  | r=0.0231<br>p=0.6067<br>n=501  | r=0.0244<br>p=0.6469<br>n=356  | r=0.0569<br>p=0.2259<br>n=455   | r=-0.0132<br>p=0.7729<br>n=479 | r=0.1017<br>p=0.3723<br>n=79  | r=0.1709<br>p=0.0041<br>n=280  | r=0.0840<br>p=0.3053<br>n=151  | r=-0.0324<br>p=0.6698<br>n=176 | r=-0.0127<br>p=0.7994<br>n=406 | r=-0.0133<br>p=0.8702<br>n=153 | r=0.0462<br>p=0.4962<br>n=219  | r=-0.1079<br>p=0.0259<br>n=426 | r=-0.1162<br>p=0.0222<br>n=387 | r=-0.0734<br>p=0.3996<br>n=134  | r=0.0503<br>p=0.2706<br>n=481   | r=-0.3760<br>p=2.7e-05<br>n=118 | r=0.0806<br>p=0.0739<br>n=492  | r=0.0157<br>p=0.9103<br>n=54  | r=0.1350<br>p=0.2419<br>n=77  |            |
| Eosinophils                  | r=-0.1368<br>p=0.5764<br>n=19 | r=0.0735<br>p=0.6195<br>n=48   | r=-0.2016<br>p=0.2122<br>n=33   | r=-0.2770<br>p=0.1187<br>n=101 | r=-0.2000<br>p=0.8000<br>n=101 | r=0.0712<br>p=0.4789<br>n=101  | r=NA<br>p=NA<br>n=1           | r=0.1770<br>p=0.4080<br>n=4    | r=0.0798<br>p=0.6340<br>n=4    | r=-0.0284<br>p=0.8618<br>n=40  | r=-0.3961<br>p=0.1155<br>n=17 | r=0.0788<br>p=0.6901<br>n=28   | r=-0.3055<br>p=0.2882<br>n=14   | r=-0.1823<br>p=0.0096<br>n=201 | r=0.0448<br>p=0.8354<br>n=24   | r=0.1323<br>p=0.5781<br>n=20    | r=-0.1294<br>p=0.4025<br>n=44  | r=-0.1905<br>p=0.6514<br>n=68 | r=0.2229<br>p=0.1982<br>n=35   | r=0.8286<br>p=0.0416<br>n=6    | r=0.2710<br>p=0.0826<br>n=42   | r=-0.2081<br>p=0.2613<br>n=33  | r=0.1828<br>p=0.3085<br>n=33   | r=-0.5952<br>p=0.1195<br>n=8   | r=-0.2110<br>p=0.1293<br>n=53  | r=0.0364<br>p=0.8125<br>n=45   | r=NA<br>p=NA<br>n=1             | r=0.0732<br>p=0.5989<br>n=54    | r=0.3000<br>p=0.6258<br>n=32    | r=-0.1645<br>p=0.3684<br>n=32  | r=-0.6000<br>p=0.2848<br>n=5  | r=-1.0000<br>p=NA<br>n=2      |            |
| Neutrophils                  | r=0.1545<br>p=0.6500<br>n=11  | r=-0.0243<br>p=0.7568<br>n=165 | r=-0.0405<br>p=0.4151<br>n=407  | r=-0.0918<br>p=0.2859<br>n=137 | r=-0.0451<br>p=0.8502<br>n=20  | r=0.0754<br>p=0.3214<br>n=175  | r=0.1786<br>p=0.7017<br>n=7   | r=-0.0040<br>p=0.9721<br>n=80  | r=-0.1643<br>p=0.0483<br>n=145 | r=0.0177<br>p=0.7765<br>n=260  | r=-0.3201<br>p=0.1954<br>n=18 | r=-0.0949<br>p=0.1031<br>n=296 | r=-0.0934<br>p=0.2653<br>n=144  | r=0.0170<br>p=0.7886<br>n=301  | r=0.0268<br>p=0.7416<br>n=154  | r=0.0333<br>p=0.5791<br>n=279   | r=0.1437<br>p=0.0161<br>n=280  | r=0.0149<br>p=0.9219<br>n=46  | r=-0.0196<br>p=0.8165<br>n=143 | r=0.2584<br>p=0.0308<br>n=70   | r=0.0643<br>p=0.7137<br>n=35   | r=-0.0244<br>p=0.9100<br>n=24  | r=-0.0413<br>p=0.7500<br>n=62  | r=0.0292<br>p=0.8159<br>n=66   | r=-0.0499<br>p=0.6579<br>n=81  | r=-0.0471<br>p=0.5453<br>n=167 | r=-0.2500<br>p=0.5887<br>n=7    | r=-0.1460<br>p=0.1535<br>n=97   | r=-0.5636<br>p=0.0710<br>n=11   | r=-0.1399<br>p=0.0878<br>n=150 | r=-0.0667<br>p=0.8548<br>n=10 | r=0.0286<br>p=0.9572<br>n=6   |            |
| Lymphocytes                  | r=-0.1074<br>p=0.3495<br>n=78 | r=-0.0371<br>p=0.4615<br>n=397 | r=-0.0006<br>p=0.9845<br>n=1090 | r=-0.1038<br>p=0.0717<br>n=302 | r=0.1579<br>p=0.1003<br>n=35   | r=-0.0783<br>p=0.1003<br>n=442 | r=0.0256<br>p=0.8630<br>n=48  | r=0.0915<br>p=0.2297<br>n=174  | r=-0.0083<br>p=0.9182<br>n=156 | r=0.1678<br>p=0.0001<br>n=516  | r=0.2447<br>p=0.0495<br>n=65  | r=-0.0488<br>p=0.2691<br>n=515 | r=0.0070<br>p=0.9071<br>n=279   | r=0.0707<br>p=0.1096<br>n=514  | r=0.0430<br>p=0.4152<br>n=362  | r=0.0253<br>p=0.5893<br>n=457   | r=0.0513<br>p=0.2585<br>n=487  | r=0.0729<br>p=0.5123<br>n=83  | r=-0.0447<br>p=0.4377<br>n=303 | r=0.1203<br>p=0.1399<br>n=152  | r=0.0396<br>p=0.5979<br>n=180  | r=0.0971<br>p=0.0506<br>n=406  | r=-0.1196<br>p=0.1370<br>n=156 | r=-0.0452<br>p=0.5007<br>n=224 | r=-0.0153<br>p=0.7920<br>n=471 | r=0.0134<br>p=0.7920<br>n=391  | r=0.4741<br>p=1.0e-09<br>n=149  | r=-0.0301<br>p=0.4984<br>n=508  | r=0.4601<br>p=1.2e-07<br>n=120  | r=-0.1231<br>p=0.0046<br>n=528 | r=-0.1773<br>p=0.1870<br>n=57 | r=-0.1237<br>p=0.2745<br>n=80 |            |
| T Cells Regulatory Tregs     | r=0.1299<br>p=0.6192<br>n=17  | r=0.1875<br>p=0.0018<br>n=276  | r=0.0875<br>p=0.0118<br>n=828   | r=0.1505<br>p=0.0147<br>n=262  | r=0.1031<br>p=0.5811<br>n=31   | r=-0.0090<br>p=0.8611<br>n=377 | r=0.2711<br>p=0.0865<br>n=41  | r=0.0262<br>p=0.7915<br>n=104  | r=0.0490<br>p=0.6640<br>n=81   | r=0.1870<br>p=0.0002<br>n=387  | r=0.1577<br>p=0.3377<br>n=39  | r=0.0293<br>p=0.5463<br>n=427  | r=0.1189<br>p=0.0784<br>n=220   | r=-0.0644<br>p=0.5907<br>n=72  | r=0.0600<br>p=0.3077<br>n=291  | r=-0.0436<br>p=0.4013<br>n=372  | r=-0.0861<br>p=0.1236<br>n=321 | r=0.1286<br>p=0.2959<br>n=68  | r=-0.0106<br>p=0.8694<br>n=243 | r=0.1667<br>p=0.0490<br>n=140  | r=0.1603<br>p=0.1850<br>n=70   | r=-0.0212<br>p=0.7932<br>n=156 | r=0.0751<br>p=0.3846<br>n=136  | r=-0.0406<br>p=0.6004<br>n=169 | r=0.0124<br>p=0.8036<br>n=404  | r=0.0116<br>p=0.8297<br>n=349  | r=-0.1103<br>p=0.2114<br>n=130  | r=0.0916<br>p=0.0845<br>n=356   | r=0.4235<br>p=2.0e-06<br>n=117  | r=-0.0474<br>p=0.3078<br>n=465 | r=-0.1881<br>p=0.3679<br>n=25 | r=0.0954<br>p=0.4723<br>n=59  |            |
| T Cells gamma delta          | r=NA<br>p=NA<br>n=NA          | r=-0.0371<br>p=0.8667<br>n=23  | r=-0.0063<br>p=0.9400<br>n=146  | r=-0.3395<br>p=0.1681<br>n=18  | r=NA<br>p=NA<br>n=1            | r=0.0714<br>p=0.8790<br>n=7    | r=0.0847<br>p=0.7384<br>n=18  | r=NA<br>p=NA<br>n=1            | r=0.0075<br>p=0.9749<br>n=20   | r=0.0929<br>p=0.7138<br>n=18   | r=0.1423<br>p=0.7150<br>n=9   | r=-0.1629<br>p=0.1461<br>n=81  | r=-0.5543<br>p=0.0210<br>n=17   | r=-1.0000<br>p=0.0e+00<br>n=4  | r=-0.0321<br>p=0.8321<br>n=46  | r=-0.0152<br>p=0.9463<br>n=22   | r=-0.3217<br>p=0.2423<br>n=15  | r=0.1000<br>p=0.7980<br>n=9   | r=0.2637<br>p=0.2357<br>n=22   | r=1.0000<br>p=NA<br>n=3        | r=NA<br>p=NA<br>n=NA           | r=-1.0000<br>p=NA<br>n=3       | r=0.5000<br>p=0.5000<br>n=3    | r=-0.3198<br>p=0.0443<br>n=40  | r=0.1797<br>p=0.7040<br>n=44   | r=-0.2000<br>p=0.4924<br>n=6   | r=0.1409<br>p=0.4924<br>n=26    | r=0.0463<br>p=0.7980<br>n=33    | r=-1.0000<br>p=NA<br>n=2        | r=0.0623<br>p=0.6672<br>n=50   | r=-0.4000<br>p=0.6000<br>n=4  | r=0.2000<br>p=0.8000<br>n=4   |            |
| T Cells Follicular Helper    | r=-0.0540<br>p=0.7187<br>n=47 | r=-0.0329<br>p=0.5234<br>n=378 | r=0.0488<br>p=0.1118<br>n=1064  | r=0.0536<br>p=0.3542<br>n=301  | r=0.2823<br>p=0.1004<br>n=35   | r=-0.0835<br>p=0.0886<br>n=417 | r=0.0941<br>p=0.5245<br>n=48  | r=0.1234<br>p=0.1235<br>n=157  | r=-0.0236<br>p=0.7748<br>n=149 | r=0.0894<br>p=0.0509<br>n=478  | r=0.1210<br>p=0.3698<br>n=57  | r=-0.0780<br>p=0.0975<br>n=457 | r=0.1738<br>p=0.0096<br>n=221   | r=0.0542<br>p=0.2769<br>n=405  | r=0.0720<br>p=0.2009<br>n=317  | r=0.0251<br>p=0.5987<br>n=441   | r=-0.0043<br>p=0.9272<br>n=456 | r=0.2789<br>p=0.0112<br>n=82  | r=0.0150<br>p=0.7980<br>n=295  | r=0.0795<br>p=0.3438<br>n=144  | r=0.0470<br>p=0.5505<br>n=164  | r=0.0503<br>p=0.3183<br>n=395  | r=0.0378<br>p=0.6462<br>n=150  | r=0.0326<br>p=0.6522<br>n=194  | r=0.0415<br>p=0.3703<br>n=469  | r=0.1501<br>p=0.0034<br>n=378  | r=0.1534<br>p=0.0619<br>n=149   | r=0.0431<br>p=0.3382<br>n=495   | r=-0.4160<br>p=2.3e-06<br>n=120 | r=-0.0417<br>p=0.3398<br>n=526 | r=-0.0342<br>p=0.8061<br>n=54 | r=-0.1697<br>p=0.1665<br>n=68 |            |
| T Cells CD8                  | r=-0.0878<br>p=0.4540<br>n=75 | r=-0.0257<br>p=0.6116<br>n=393 | r=0.0715<br>p=0.0189<br>n=1078  | r=0.0131<br>p=0.8228<br>n=296  | r=0.2263<br>p=0.1912<br>n=35   | r=0.0391<br>p=0.4137<br>n=439  | r=-0.0134<br>p=0.9282<br>n=48 | r=-0.0265<br>p=0.7340<br>n=167 | r=0.1272<br>p=0.1445<br>n=133  | r=0.0345<br>p=0.4388<br>n=506  | r=0.1052<br>p=0.4237<br>n=60  | r=-0.0602<br>p=0.1741<br>n=511 | r=0.0761<br>p=0.2062<br>n=278   | r=0.2300<br>p=3.9e-07<br>n=476 | r=-0.0008<br>p=0.9887<br>n=357 | r=0.0156<br>p=0.7389<br>n=457   | r=-0.0454<br>p=0.3180<br>n=485 | r=0.0517<br>p=0.6427<br>n=83  | r=0.0682<br>p=0.2522<br>n=284  | r=0.0945<br>p=0.2486<br>n=151  | r=0.0209<br>p=0.7817<br>n=178  | r=0.0703<br>p=0.1572<br>n=406  | r=0.1535<br>p=0.0565<br>n=155  | r=0.0407<br>p=0.5512<br>n=217  | r=0.0598<br>p=0.2043<br>n=453  | r=0.0964<br>p=0.0575<br>n=389  | r=0.1900<br>p=0.0207<br>n=148   | r=0.0413<br>p=0.3537<br>n=506   | r=0.0050<br>p=0.9564<br>n=120   | r=0.0228<br>p=0.6052<br>n=517  | r=-0.2227<br>p=0.1056<br>n=54 | r=-0.1066<br>p=0.3834<br>n=69 |            |
| T Cells CD4 Naive            | r=-0.0807<br>p=0.6950<br>n=26 | r=-0.0934<br>p=0.3059<br>n=122 | r=0.4361<br>p=0.0546<br>n=20    | r=-0.0233<br>p=0.9293<br>n=17  | r=0.5000<br>p=NA<br>n=3        | r=0.2574<br>p=0.1861<br>n=28   | r=NA<br>p=NA<br>n=NA          | r=-0.0699<br>p=0.8290<br>n=12  | r=-0.2000<br>p=0.6672<br>n=7   | r=0.0735<br>p=0.5939<br>n=55   | r=0.2571<br>p=0.6228<br>n=6   | r=0.4865<br>p=0.2682<br>n=7    | r=-0.2571<br>p=0.6228<br>n=6    | r=-0.0326<br>p=0.5961<br>n=267 | r=0.1489<br>p=0.4008<br>n=34   | r=NA<br>p=NA<br>n=1             | r=0.0171<br>p=0.9271<br>n=31   | r=NA<br>p=NA<br>n=NA          | r=0.0616<br>p=0.8343<br>n=14   | r=1.0000<br>p=NA<br>n=2        | r=-0.7000<br>p=0.1881<br>n=5   | r=NA<br>p=NA<br>n=NA           | r=0.2121<br>p=0.5563<br>n=10   | r=0.0643<br>p=0.8199<br>n=15   | r=-0.0425<br>p=0.8057<br>n=36  | r=0.7714<br>p=0.0724<br>n=6    | r=0.8000<br>p=0.2000<br>n=4     | r=-0.3359<br>p=0.0934<br>n=26   | r=0.0722<br>p=0.5245<br>n=80    | r=-0.2027<br>p=0.2578<br>n=33  | r=-0.6071<br>p=0.1482<br>n=7  | r=0.0712<br>p=0.7530<br>n=22  |            |
| T Cells CD4 Memory Resting   | r=0.1266<br>p=0.2857<br>n=73  | r=-0.0547<br>p=0.4264<br>n=214 | r=-0.0784<br>p=0.0128<br>n=1007 | r=-0.1827<br>p=0.0171<br>n=170 | r=-0.1862<br>p=0.3160<br>n=31  | r=-0.0211<br>p=0.6796<br>n=387 | r=-0.6905<br>p=0.0580<br>n=8  | r=-0.0617<br>p=0.4415<br>n=158 | r=-0.0098<br>p=0.9071<br>n=144 | r=-0.0048<br>p=0.9229<br>n=408 | r=-0.0106<br>p=0.9350<br>n=62 | r=0.0097<br>p=0.8324<br>n=482  | r=-0.2591<br>p=1.6e-05<br>n=270 | r=-0.0385<br>p=0.4359<br>n=411 | r=-0.0640<br>p=0.2564<br>n=316 | r=-0.2190<br>p=6.4e-06<br>n=417 | r=-0.0748<br>p=0.1366<br>n=397 | r=-0.1770<br>p=0.1163<br>n=80 | r=-0.1101<br>p=0.0639<br>n=284 | r=-0.1040<br>p=0.2052<br>n=150 | r=0.0661<br>p=0.3803<br>n=178  | r=-0.1118<br>p=0.0249<br>n=402 | r=-0.2141<br>p=0.0111<br>n=140 | r=-0.1101<br>p=0.1235<br>n=197 | r=-0.0445<br>p=0.4678<br>n=269 | r=-0.0335<br>p=0.5203<br>n=371 | r=0.1638<br>p=0.0815<br>n=114   | r=-0.1922<br>p=4.3e-05<br>n=447 | r=0.1481<br>p=0.4184<br>n=32    | r=-0.0649<br>p=0.2049<br>n=383 | r=-0.3502<br>p=0.0198<br>n=44 | r=-0.0304<br>p=0.8225<br>n=57 |            |
| T Cells CD4 Memory Activated | r=-1.0000<br>p=NA<br>n=2      | r=-0.0868<br>p=0.3630<br>n=112 | r=0.0424<br>p=0.5807<br>n=172   | r=0.0133<br>p=0.8967<br>n=98   | r=-1.0000<br>p=NA<br>n=2       | r=0.0697<br>p=0.3447<br>n=186  | r=0.0116<br>p=0.9432<br>n=40  | r=0.0955<br>p=0.4184<br>n=74   | r=-0.0182<br>p=0.9577<br>n=11  | r=0.0800<br>p=0.2211<br>n=236  | r=NA<br>p=NA<br>n=1           | r=-0.3188<br>p=0.0422<br>n=41  | r=0.2619<br>p=0.5309<br>n=8     | r=0.4791<br>p=0.2297<br>n=8    | r=-0.1992<br>p=0.3094<br>n=28  | r=0.0609<br>p=0.4845<br>n=134   | r=0.0683<br>p=0.3231<br>n=211  | r=-0.3571<br>p=0.4316<br>n=7  | r=0.2429<br>p=0.3831<br>n=15   | r=-0.2871<br>p=0.2638<br>n=17  | r=-0.4000<br>p=0.6000<br>n=4   | r=-1.0000<br>p=NA<br>n=2       | r=-0.3143<br>p=0.0068<br>n=73  | r=0.0456<br>p=0.8108<br>n=30   | r=-0.1080<br>p=0.1598<br>n=171 | r=0.0314<br>p=0.6907<br>n=163  | r=0.0798<br>p=0.6436<br>n=36    | r=-0.1278<br>p=0.6634<br>n=14   | r=0.2624<br>p=0.2264<br>n=23    | r=-0.0334<br>p=0.7788<br>n=73  | r=0.1000<br>p=0.8729<br>n=5   | r=-1.0000<br>p=0.0e+00<br>n=4 |            |
| Plasma Cells                 | r=-0.0967<br>p=0.5040<br>n=50 | r=0.0772<br>p=0.1512<br>n=347  | r=0.0379<br>p=0.2501<br>n=923   | r=-0.0817<br>p=0.1688<br>n=285 | r=-0.2328<br>p=0.2628<br>n=425 | r=-0.1383<br>p=0.0068<br>n=17  | r=0.0528<br>p=0.8406<br>n=17  | r=0.1284<br>p=0.1250<br>n=144  | r=-0.0037<br>p=0.9803<br>n=47  | r=                             |                               |                                |                                 |                                |                                |                                 |                                |                               |                                |                                |                                |                                |                                |                                |                                |                                |                                 |                                 |                                 |                                |                               |                               |            |
