# Supplementary material for: Targeting BRF2 in Cancer with Repurposed Drugs Using in Silico Methods
Source: Preprints.org preprint supplement (doi:10.20944/preprints202012.0770.v1), 2020-12-31
Supplement: Supplementary file 4 [file supplementary]

| Signal Transduction Pathways (BRF2) |                     |                                |                                |                                |                               |                                |                                |                                |                                |                                |                                |                                |
|-------------------------------------|---------------------|--------------------------------|--------------------------------|--------------------------------|-------------------------------|--------------------------------|--------------------------------|--------------------------------|--------------------------------|--------------------------------|--------------------------------|--------------------------------|
| Signal Transduction Pathway         | Cancer type         |                                |                                |                                |                               |                                |                                |                                |                                |                                |                                |                                |
|                                     | BLCA                | BRCA                           | COAD                           | GBM                            | HNSC                          | KIRC                           | LUAD                           | LUSC                           | OV                             | READ                           | UCEC                           |                                |
|                                     | Hormone             | r=−0.1719<br>p=0.0542<br>n=126 | r=0.0377<br>p=0.3019<br>n=753  | r=−0.0644<br>p=0.2452<br>n=327 | r=0.0960<br>p=0.4256<br>n=71  | r=0.0441<br>p=0.5235<br>n=212  | r=0.0144<br>p=0.7605<br>n=451  | r=0.0564<br>p=0.3906<br>n=234  | r=−0.0510<br>p=0.4816<br>n=193 | r=0.0427<br>p=0.5224<br>n=227  | r=0.0155<br>p=0.8654<br>n=122  | r=−0.0773<br>p=0.1267<br>n=392 |
|                                     | TSC mTOR            | r=0.0294<br>p=0.7435<br>n=126  | r=0.1728<br>p=1.9e−06<br>n=753 | r=−0.1315<br>p=0.0173<br>n=327 | r=−0.2344<br>p=0.0491<br>n=71 | r=−0.0033<br>p=0.9617<br>n=212 | r=−0.1485<br>p=0.0016<br>n=451 | r=−0.0318<br>p=0.6285<br>n=234 | r=0.3014<br>p=2.1e−05<br>n=193 | r=0.0530<br>p=0.4265<br>n=227  | r=−0.1677<br>p=0.0648<br>n=122 | r=0.0283<br>p=0.5771<br>n=392  |
|                                     | RTK score           | r=−0.1767<br>p=0.0477<br>n=126 | r=−0.1328<br>p=0.0003<br>n=753 | r=−0.0685<br>p=0.2167<br>n=327 | r=0.0916<br>p=0.4472<br>n=71  | r=−0.1787<br>p=0.0091<br>n=212 | r=−0.0468<br>p=0.3214<br>n=451 | r=−0.0852<br>p=0.1941<br>n=234 | r=−0.0701<br>p=0.3328<br>n=193 | r=0.0387<br>p=0.5617<br>n=227  | r=−0.0140<br>p=0.8783<br>n=122 | r=−0.0847<br>p=0.0939<br>n=392 |
|                                     | Ras MAPK            | r=−0.2836<br>p=0.0013<br>n=126 | r=−0.1166<br>p=0.0013<br>n=753 | r=−0.0777<br>p=0.1611<br>n=327 | r=−0.0459<br>p=0.7040<br>n=71 | r=−0.0704<br>p=0.3077<br>n=212 | r=−0.0949<br>p=0.0440<br>n=451 | r=−0.0712<br>p=0.2780<br>n=234 | r=0.0257<br>p=0.7229<br>n=193  | r=0.0310<br>p=0.6427<br>n=227  | r=−0.1972<br>p=0.0295<br>n=122 | r=−0.1448<br>p=0.0041<br>n=392 |
|                                     | PI3K Akt            | r=−0.0926<br>p=0.3025<br>n=126 | r=−0.0751<br>p=0.0395<br>n=753 | r=−0.0397<br>p=0.4744<br>n=327 | r=−0.2901<br>p=0.0141<br>n=71 | r=0.0923<br>p=0.1808<br>n=212  | r=−0.0337<br>p=0.4757<br>n=451 | r=0.0568<br>p=0.3870<br>n=234  | r=0.0446<br>p=0.5381<br>n=193  | r=0.0666<br>p=0.3181<br>n=227  | r=−0.1595<br>p=0.0793<br>n=122 | r=0.0411<br>p=0.4165<br>n=392  |
|                                     | Hormone b           | r=0.1177<br>p=0.1894<br>n=126  | r=0.0151<br>p=0.6782<br>n=753  | r=−0.0449<br>p=0.4188<br>n=327 | r=−0.0776<br>p=0.5203<br>n=71 | r=0.0310<br>p=0.6535<br>n=212  | r=0.0549<br>p=0.2447<br>n=451  | r=−0.0584<br>p=0.3736<br>n=234 | r=0.0543<br>p=0.4531<br>n=193  | r=−0.0354<br>p=0.5954<br>n=227 | r=0.2708<br>p=0.0026<br>n=122  | r=−0.1206<br>p=0.0169<br>n=392 |
|                                     | EMT score           | r=−0.1010<br>p=0.2605<br>n=126 | r=−0.0669<br>p=0.0664<br>n=753 | r=0.0250<br>p=0.6518<br>n=327  | r=−0.0743<br>p=0.5382<br>n=71 | r=−0.0102<br>p=0.8829<br>n=212 | r=−0.0372<br>p=0.4311<br>n=451 | r=−0.0286<br>p=0.6635<br>n=234 | r=0.0824<br>p=0.2545<br>n=193  | r=−0.0953<br>p=0.1523<br>n=227 | r=0.0652<br>p=0.4755<br>n=122  | r=0.0811<br>p=0.1088<br>n=392  |
|                                     | DNA damage response | r=−0.0340<br>p=0.7054<br>n=126 | r=−0.0055<br>p=0.8802<br>n=753 | r=0.0395<br>p=0.4766<br>n=327  | r=0.0327<br>p=0.7869<br>n=71  | r=0.0114<br>p=0.8691<br>n=212  | r=0.0709<br>p=0.1328<br>n=451  | r=0.0632<br>p=0.3357<br>n=234  | r=−0.0120<br>p=0.8687<br>n=193 | r=0.0092<br>p=0.8907<br>n=227  | r=0.0743<br>p=0.4159<br>n=122  | r=−0.0569<br>p=0.2611<br>n=392 |
|                                     | Combined reactive   | r=−0.1652<br>p=0.0646<br>n=126 | r=−0.0320<br>p=0.3808<br>n=753 | r=−0.0281<br>p=0.6124<br>n=327 | r=−0.0318<br>p=0.7923<br>n=71 | r=−0.0649<br>p=0.3467<br>n=212 | r=−0.0557<br>p=0.2380<br>n=451 | r=0.0136<br>p=0.8360<br>n=234  | r=0.1178<br>p=0.1029<br>n=193  | r=−0.1203<br>p=0.0705<br>n=227 | r=0.0110<br>p=0.9042<br>n=122  | r=0.0623<br>p=0.2182<br>n=392  |
| Cell cycle                          |                     | r=−0.0913<br>p=0.3093<br>n=126 | r=0.1133<br>p=0.0018<br>n=753  | r=0.0791<br>p=0.1535<br>n=327  | r=0.0140<br>p=0.9077<br>n=71  | r=0.0516<br>p=0.4546<br>n=212  | r=−0.0044<br>p=0.9260<br>n=451 | r=0.1436<br>p=0.0280<br>n=234  | r=−0.0111<br>p=0.8783<br>n=193 | r=−0.0728<br>p=0.2748<br>n=227 | r=−0.0473<br>p=0.6051<br>n=122 | r=0.1207<br>p=0.0168<br>n=392  |
| Breast reactive                     |                     | r=−0.2123<br>p=0.0170<br>n=126 | r=−0.0033<br>p=0.9272<br>n=753 | r=−0.0908<br>p=0.1010<br>n=327 | r=−0.0023<br>p=0.9846<br>n=71 | r=−0.1007<br>p=0.1438<br>n=212 | r=−0.0331<br>p=0.4827<br>n=451 | r=0.0117<br>p=0.8593<br>n=234  | r=0.0970<br>p=0.1795<br>n=193  | r=−0.1189<br>p=0.0738<br>n=227 | r=−0.0661<br>p=0.4693<br>n=122 | r=0.0440<br>p=0.3848<br>n=392  |
| Apoptosis                           |                     | r=0.0220<br>p=0.8066<br>n=126  | r=−0.0589<br>p=0.1066<br>n=753 | r=0.0727<br>p=0.1895<br>n=327  | r=0.0906<br>p=0.4525<br>n=71  | r=−0.0079<br>p=0.9090<br>n=212 | r=−0.0468<br>p=0.3209<br>n=451 | r=0.1032<br>p=0.1154<br>n=234  | r=0.0170<br>p=0.8149<br>n=193  | r=−0.0917<br>p=0.1686<br>n=227 | r=0.1430<br>p=0.1162<br>n=122  | r=0.0464<br>p=0.3597<br>n=392  |
