# Supplementary material for: Targeting BRF2 in Cancer with Repurposed Drugs Using in Silico Methods
Source: Preprints.org preprint supplement (doi:10.20944/preprints202012.0770.v1), 2020-12-31
Supplement: Supplementary file 6 [file supplementary]

# Neoantigens and cancer testis antigens (BRF2)

|                                 | Cancer type                   |                                |                                |                               |                               |                               |                               |                               |                                |                               |                                |                                |                               |                                |                                |                               |                              |                                |                                |                                |                               |                                |                                |                                |                               |                                |                                |                                |                               |                               |                               |
|---------------------------------|-------------------------------|--------------------------------|--------------------------------|-------------------------------|-------------------------------|-------------------------------|-------------------------------|-------------------------------|--------------------------------|-------------------------------|--------------------------------|--------------------------------|-------------------------------|--------------------------------|--------------------------------|-------------------------------|------------------------------|--------------------------------|--------------------------------|--------------------------------|-------------------------------|--------------------------------|--------------------------------|--------------------------------|-------------------------------|--------------------------------|--------------------------------|--------------------------------|-------------------------------|-------------------------------|-------------------------------|
|                                 | ACC                           | BLCA                           | BRCA                           | CESC                          | CHOL                          | COAD                          | DLBC                          | ESCA                          | GBM                            | HNSC                          | KIRC                           | KIRP                           | LGG                           | LIHC                           | LUAD                           | LUSC                          | MESO                         | OV                             | PAAD                           | PCPG                           | PRAD                          | READ                           | SARC                           | SKCM                           | STAD                          | TGCT                           | THCA                           | THYM                           | UCEC                          | UCS                           | UVM                           |
| Cancer/testis (CT) antigen load | r=0.1201<br>p=0.3014<br>n=76  | r=-0.0171<br>p=0.7357<br>n=391 | r=0.0060<br>p=0.8462<br>n=1057 | r=0.0553<br>p=0.3596<br>n=277 | r=-0.1896<br>p=0.2754<br>n=35 | r=0.0355<br>p=0.4700<br>n=416 | r=NA<br>p=NA<br>n=NA          | r=0.0473<br>p=0.5367<br>n=173 | r=0.1338<br>p=0.1051<br>n=148  | r=0.1064<br>p=0.0163<br>n=509 | r=0.0426<br>p=0.3398<br>n=505  | r=-0.0983<br>p=0.1043<br>n=274 | r=0.1206<br>p=0.0066<br>n=506 | r=0.0525<br>p=0.3278<br>n=349  | r=0.0771<br>p=0.1058<br>n=441  | r=0.1379<br>p=0.0025<br>n=477 | r=0.1536<br>p=0.1709<br>n=81 | r=0.0435<br>p=0.4800<br>n=266  | r=0.0553<br>p=0.5017<br>n=150  | r=0.1568<br>p=0.0456<br>n=163  | r=0.1231<br>p=0.0136<br>n=401 | r=0.0417<br>p=0.6164<br>n=147  | r=0.1131<br>p=0.0942<br>n=220  | r=-0.0912<br>p=0.3571<br>n=104 | r=0.0353<br>p=0.5013<br>n=365 | r=0.2250<br>p=0.0092<br>n=133  | r=-0.0890<br>p=0.0464<br>n=501 | r=NA<br>p=NA<br>n=NA           | r=0.0180<br>p=0.6823<br>n=519 | r=0.0063<br>p=0.9635<br>n=55  | r=-0.1952<br>p=0.0827<br>n=80 |
| Indel neoantigen load           | r=-0.1723<br>p=0.2753<br>n=42 | r=0.0952<br>p=0.0738<br>n=354  | r=0.0531<br>p=0.1569<br>n=713  | r=0.0989<br>p=0.1802<br>n=185 | r=-0.0481<br>p=0.8193<br>n=25 | r=0.1066<br>p=0.0599<br>n=312 | r=-0.0661<br>p=0.7238<br>n=31 | r=NA<br>p=NA<br>n=NA          | r=0.1183<br>p=0.2898<br>n=82   | r=0.0501<br>p=0.3220<br>n=392 | r=-0.0336<br>p=0.5512<br>n=317 | r=0.0704<br>p=0.2705<br>n=247  | r=0.0783<br>p=0.1629<br>n=319 | r=-0.1004<br>p=0.0809<br>n=303 | r=-0.0131<br>p=0.7827<br>n=443 | r=0.0698<br>p=0.1446<br>n=439 | r=0.0328<br>p=0.8122<br>n=55 | r=NA<br>p=NA<br>n=NA           | r=0.1570<br>p=0.1489<br>n=86   | r=0.0117<br>p=0.9503<br>n=31   | r=0.0479<br>p=0.4404<br>n=262 | r=0.0656<br>p=0.5148<br>n=101  | r=-0.0757<br>p=0.3900<br>n=131 | r=0.0887<br>p=0.4720<br>n=68   | r=NA<br>p=NA<br>n=NA          | r=0.0840<br>p=0.5127<br>n=63   | r=-0.1037<br>p=0.2723<br>n=114 | r=0.2238<br>p=0.1144<br>n=51   | r=0.0580<br>p=0.2554<br>n=387 | r=0.1645<br>p=0.2980<br>n=42  | r=0.1961<br>p=0.3080<br>n=29  |
| SNV neoantigen load             | r=0.0560<br>p=0.6307<br>n=76  | r=-0.0377<br>p=0.4519<br>n=401 | r=0.0423<br>p=0.1855<br>n=982  | r=0.0041<br>p=0.9455<br>n=275 | r=0.0535<br>p=0.7603<br>n=35  | r=0.0636<br>p=0.2261<br>n=364 | r=0.0905<br>p=0.5942<br>n=37  | r=0.0908<br>p=0.2862<br>n=140 | r=-0.1133<br>p=0.1810<br>n=141 | r=0.0943<br>p=0.0395<br>n=477 | r=-0.1183<br>p=0.0278<br>n=346 | r=-0.0487<br>p=0.4291<br>n=266 | r=0.0370<br>p=0.4082<br>n=502 | r=0.0462<br>p=0.3933<br>n=343  | r=0.0877<br>p=0.0512<br>n=495  | r=0.0597<br>p=0.2020<br>n=458 | r=0.2404<br>p=0.0340<br>n=78 | r=-0.1045<br>p=0.1929<br>n=157 | r=-0.0293<br>p=0.7160<br>n=157 | r=-0.0476<br>p=0.5541<br>n=157 | r=0.0546<br>p=0.2311<br>n=482 | r=-0.0056<br>p=0.9510<br>n=121 | r=0.0612<br>p=0.3565<br>n=229  | r=0.1929<br>p=0.0498<br>n=104  | r=0.2685<br>p=0.0085<br>n=95  | r=-0.0567<br>p=0.5030<br>n=142 | r=0.0304<br>p=0.5120<br>n=469  | r=-0.2940<br>p=0.0014<br>n=115 | r=0.0677<br>p=0.1296<br>n=503 | r=-0.3449<br>p=0.0099<br>n=55 | r=0.1517<br>p=0.1938<br>n=75  |

Spearman\_r

1.0

0.5

0.0

-0.5

-1.0
