# Supplementary figures and images for: Targeting BRF2 in Cancer with Repurposed Drugs Using in Silico Methods
Source: Preprints.org preprint supplement (doi:10.20944/preprints202012.0770.v1), 2020-12-31

norm\_tum tumor normal

BRF2

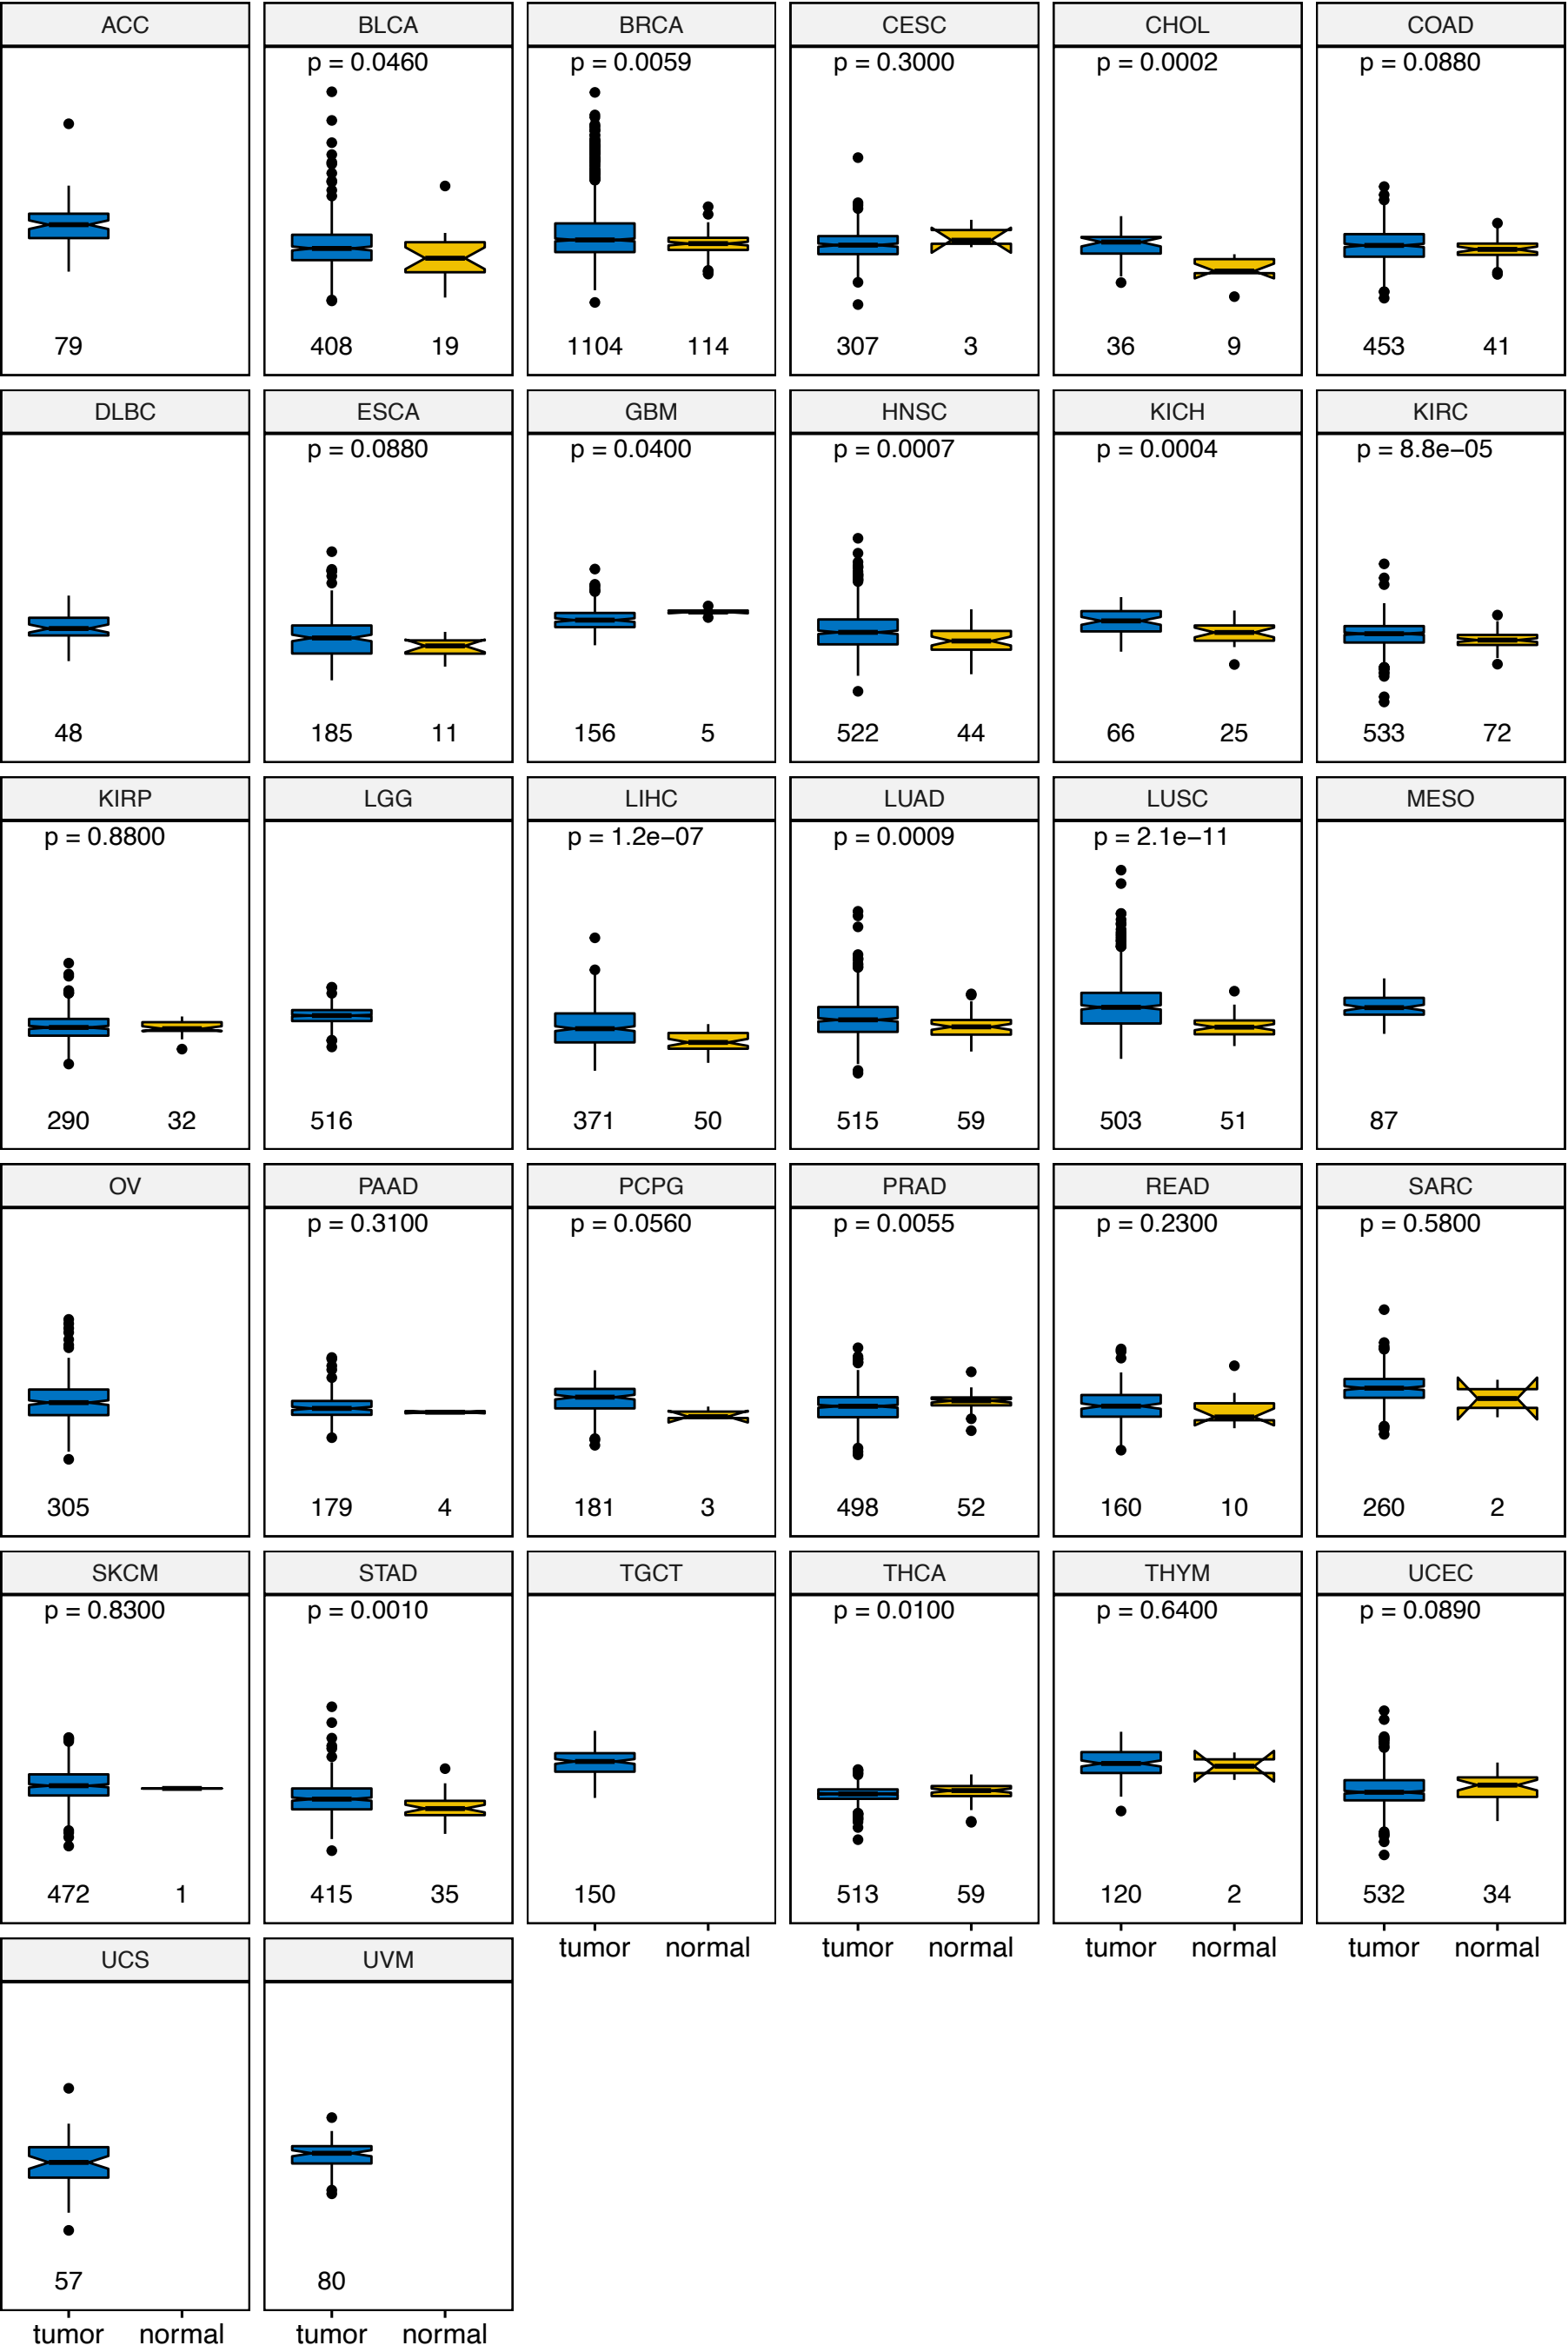

norm\_tum

Supplement: Supplementary file 5 [file supplementary]
